# Supplementary material
Source: publisher figshare collection journal article supplement (https://karger.figshare.com/ndownloader/files/22643219)
Supplement: Supplementary file 1 [file 22643219]

**Labs:**

| INR | 2.5 | Target 2–3 |
| --- | --- | --- |
| Urea | 4.9 mmol/L | (ref. range 2.76 – 8.07 mmol/L) |
| Creatinin | 98 μmol/L | (ref. range 53-97 μmol/L) |
| ProBNP | 250 pg/mL | (ref. range 0 – 130 pg/mL) |
| Troponine T | 201st set 5.82nd set 4.63rd set ng/L | (ref. range 0 – 14 ng/L) |
| PH | 7.41 | (ref. range 7.35 – 7.45) |
| PO2 | 46 mmHg | (Ref. range 83 – 108 mmHg) |
| PCO2 | 37 mmHg | (Ref. range 35 – 45 mmHg) |
| HCO3 | 23.7 mmol/L | (Ref. range 23 – 29 mmol/L) |
